# Supplementary material for: ABS-TrustSDN: An Agent-Based Simulator of Trust Strategies in Software-Defined Networks
Source: Hindawi journal article supplement (doi:10.1155/2017/8575842), 2017-01-01
Supplement: f1 [file 8575842.f1.zip]

Archive with 2 entries (2 files):
- ABSTrustSDNSourceCode.zip
- att_4ff6957d4d004a2ead91d57a5c2892b3.txt
