# Supplementary material for: ABS-TrustSDN: An Agent-Based Simulator of Trust Strategies in Software-Defined Networks
Source: Hindawi journal article supplement (doi:10.1155/2017/8575842), 2017-01-01
Supplement: f1 [file 8575842.f1.zip › att_4ff6957d4d004a2ead91d57a5c2892b3.txt]

> El 18 sept 2017, a las 8:55, Amira El Baroudi <amira.elbaroudi@hindawi.com> escribió:
> 
> Dear Dr. García-Magariño,
> 
> Please provide me with the materials you would like to add as the
> supplementary materials.
> 
> I look forward to hearing from you.
> 
> Best regards,
> 
> Amira
> 
> --
> ***************************************
> Amira Elbaroudi
> Editorial Office
> Hindawi
> http://www.hindawi.com
> **************************************
> 
> 
> On 9/11/2017 10:14:24 PM  wrote:
>> Dear Amira,
>> I confirm that the supplementary materials are valid, and these should be included in the manuscript.
>> It is our sincerest hope that the publication of these materials will increase the impact of our research.
>> Best regards,
>> Iván García-Magariño
>> 
>> lunes, 11 septiembre 2017, 11:37p. m. +02:00 de Amira El Baroudi amira.elbaroudi@hindawi.com:
>> 
>> 
>>   Dear Dr.
>> 
>> Please confirm whether or not the uploaded supplementary materials are
>> scientifically valid and whether they should be included in the
>> manuscript or not.
>> 
>> I look forward to hearing from you.
>> 
>> Best regards,
>> 
>> Amira
>> 
>> --
>> ***************************************
>> Amira Elbaroudi
>> Editorial Office
>> Hindawi
>> http://www.hindawi.com
>> **************************************
>> 
>> 
>> On 9/10/2017 6:13:42 PM Security and Communication Networks wrote:
>>> Dear Dr. García-Magariño,
>>> 
>>> This is to confirm the receipt of the electronic files of Research Article 8575842 titled "ABS-TrustSDN: An agent-based simulator of trust strategies in software-defined networks" by Iván García-Magariño and Raquel Lacuesta. We will check all the uploaded files and contact you if anything else is needed.
>>> 
>>> Thank you for your cooperation.
>>> 
>>> Best regards,
>>> 
>>> --
>>> *************************************
>>> Amira Elbaroudi
>>> Editorial Office
>>> Hindawi
>>> http://www.hindawi.com
>>> *************************************
> 
